# Supplementary material
Source: HighWire-hosted journal article supplement (http://www.qdcxjkg.com/highwire/filestream/114453/field_highwire_adjunct_files/5/ERJ-00388-2014_supplementary_table_S3.pdf)
Supplement: ERJ-00388-2014_supplementary_table_S3.pdf [file ERJ-00388-2014_supplementary_table_S3.pdf]

**Supplementary table 3.** Acclidinium treatment differences in SGRQ total score and the percentage of patients achieving a clinically significant improvement in SGRQ total score ( $\geq 4$  points) at week 24 in patients who experienced an EXACT-unreported event, an HCRU event and no exacerbation in the first 12 weeks (ITT population)

| <b>Treatment differences at week 24<br/>aclidinium 400 µg versus aclidinium 200 µg</b> |                                      |
|----------------------------------------------------------------------------------------|--------------------------------------|
| <b>SGRQ total score</b>                                                                |                                      |
| EXACT-unreported event (95% CI)                                                        | -2.54 (-7.82–2.74)<br>p=0.344        |
| HCRU event (95% CI)                                                                    | -0.54 (-8.98–7.91)<br>p=0.900        |
| No exacerbation (95% CI)                                                               | -0.20 (-2.75–2.34)<br>p=0.875        |
| <b>Aclidinium 400 µg versus aclidinium 200 µg</b>                                      |                                      |
| <b>SGRQ responders at week 24</b>                                                      |                                      |
| EXACT-unreported event, %                                                              | 50.0% vs 46.2%<br>Odds ratio p=0.643 |
| HCRU event, %                                                                          | 50.0% vs 47.8%<br>Odds ratio p=0.839 |
| No exacerbation, %                                                                     | 59.9% vs 59.5%<br>Odds ratio p=0.826 |

HCRU: aclidinium 200 µg BID n=23, aclidinium 400 µg BID n=26.

EXACT-unreported: aclidinium 200 µg BID n=52, aclidinium 400 µg BID n=46.

No exacerbation: aclidinium 200 µg BID n=200, aclidinium 400 µg BID n=197.

BID, twice daily; CI, confidence interval; EXACT, EXAcerbations of Chronic obstructive pulmonary disease Tool; HCRU, healthcare resource utilisation; ITT, intent-to-treat; SGRQ: St George's Respiratory Questionnaire.
